# Supplementary material for: GenChem v1.0 – a chemical pre-processing and testing system foratmospheric modelling
Source: Copernicus journal article supplement (doi:10.5194/gmd-2020-147), 2020-06-08
Supplement: Supplementary file 1 [file gmd-2020-147-supplement.pdf]

## Supplementary material:

# GenChem v1.0 - a chemical pre-processing and testing system for atmospheric modelling

David Simpson, Robert Bergström, Alan Briolat, Hannah Imhof,  
John Johansson, Michael Priestley, Alvaro Valdebenito

### S1. extra\_mechanisms used in boxChem and EMEP

The `extra_mechanisms` system allows for a large number of extra chemical packages to be added to a given base mechanism, in a mix n' match system. Thus, one may include, exclude, or change various reaction and emissions schemes, for example related to SOA or PM. Tables S1–S2 give a brief summary of the main extra mechanisms available in the GenChem v1.0 release, as used in boxChem and EMEP CTM modelling. Extra information on each package can usually be found in the README.md files accompanying the Species and Reactions files of each mechanism.

### S2. User-defined chemical schemes

Adding and modifying chemical mechanisms is rather easy in the GenChem system. We take the example of a gender-neutral user Jan, who wants to add a gas-phase chemistry JansChem and a SOA mechanism for EMEP usage, JansSOA. The steps needed are as follows.

#### S2.1 Own chemical mechanisms

Jan is of course free to add new mechanisms to `base_mechanisms` and `extra_mechanisms`. Just follow the formatting guidelines and examples from the currently available mechanisms. Start testing from a temporary boxChem directory, following Sect. 3, which in our example means:

**Example S1.1.**        *scripts/box\_setup.py tmp\_work*

Then, from `tmp_work`:

**Example S1.2.**        *./do.testChems JansChem*

Once the code is running with `do.testChems`, the next step for those wanting to run the EMEP model is to modify `emep_setup.py`, as described below.

## S2.2 Modification of `emep_setup.py`

Jan can then edit `emep_setup.py` (maybe renaming it as '`Jans_setup.py`', but we retain `emep_setup.py` below). If selecting from the provided `base_mechanisms` and `extra_mechanisms` you only need to extend the possible command lines as provided by the `*cmdx*` dictionary in that script.

The `-b` argument gives the base mechanism (only one allowed), and then the `-e` argument allows the addition of any number of compatible extra mechanisms. Any keys from '`cmdx`' can be used by `emep_setup.py`, e.g. if our user Jan has their own gas-phase chemical scheme (*JansChem*) one could edit `emep_setup.py` a new option::

**Example S2.3.**        `cmdx['JansChem'] = '-b JansChem -e common'`

Jan could then do::

**Example S2.4.**        `emep_setup.py JansChem`

Example S2.4 creates the directory `ZCM_JansChem` with all the files needed for EMEP runs. These files can then be transferred directly to the EMEP system in the same way as is done for the pre-defined mechanisms (Step 4, Sect. 3).

## S2.3 Modification of `emissplit` files

As noted in Sect. 6.4, the default `emissplit` files for `sox`, `nox`, `co` and `nh3` are identical across all provided schemes, and provided in the `input/emissplit_defaults` directory as files such as `emissplit_defaults_nox.csv`. For NMVOC and PM inventories specific files are needed for each chemical mechanism, and sometimes depending on available inventories. In these `emissplit` files, splits are given for each of the 11 SNAP sectors, so that for example SNAP1 (power generation) has very different splits from SNAP7 (road traffic).

In the EMEP CTM these default speciations are usually replaced by country-specific values derived from more recent emission inventories, but for input to `boxChem` a much simpler procedure is used. For `boxChem` these SNAP splits are merged into one NMVOC speciation using the relative emissions for each SNAP given by average UK emission profiles from Passant (2002) and emissions from 2010. The procedure and SNAP fractions used can be found in the Fortran module `EmisGet_mod.f90`. In principle the user could modify the numbers used in `EmisGet_mod.f90`, but since `boxChem` users just need an overall NMVOC speciation the simplest approach is to give each SNAP sector the same NMVOC split. Then the weighted NMVOC split will also be given these values.

Thus, a user-configured `emissplit` file can be used, ideally stored with a different name and in a different directory to the `boxChem` defaults. The directory with these new `emissplit` files can be set in `config_box.nml`.

**Table S1.** extra\_mechanism packages provided by GenChem 1.0 for boxChem

---

|                  |                                                                                                                               |
|------------------|-------------------------------------------------------------------------------------------------------------------------------|
| BoxAero          | Simple reactions for SO <sub>2</sub> oxidation and gas-aerosol uptake of N <sub>2</sub> O <sub>5</sub> and HNO <sub>3</sub> . |
| BoxDep           | Simple deposition reactions, for HNO <sub>3</sub> , SO <sub>2</sub> , O <sub>3</sub> , and NO <sub>2</sub>                    |
| BVOC_IsoMT1_emis | Emissions of isoprene and $\alpha$ -pinene <sup>†</sup>                                                                       |

---

Notes:

<sup>†</sup> This simple package is provided for both boxChem and EMEP since all base-mechanisms can handle isoprene and  $\alpha$ -pinene chemistry, and often  $\alpha$ -pinene is used as a surrogate for all monoterpenes. For use of more complex BVOC mixtures (e.g. with  $\beta$ -pinene, limonene, etc), the user may replace this package with a more complex emission package.

Table S2: extra\_mechanism packages provided by GenChem 1.0 for EMEP CTM modelling

---

|                                                         |                                                                                                                                                                                         |
|---------------------------------------------------------|-----------------------------------------------------------------------------------------------------------------------------------------------------------------------------------------|
| <i>General extras</i>                                   |                                                                                                                                                                                         |
| Aero2017nx                                              | Adds aerosol uptake <sup>(a)</sup> of N <sub>2</sub> O <sub>5</sub> , NO <sub>3</sub> , HNO <sub>3</sub> , HO <sub>2</sub> , H <sub>2</sub> O <sub>2</sub> and CH <sub>3</sub> OOH      |
| Ash                                                     | Volcanic ash tracers (fine and coarse)                                                                                                                                                  |
| Aqueous_EmChem16x                                       | Gas and aqueous phase reactions converting SO <sub>2</sub> to SO <sub>4</sub>                                                                                                           |
| DustExtended                                            | Emissions of Dust_f and Dust_c                                                                                                                                                          |
| PM_FFireInert                                           | Emissions of inert species ffire_OM, ffire_BC and ffire_remPPM25                                                                                                                        |
| PM_WoodFFuelInert                                       | Emissions of inert POM, EC and other components                                                                                                                                         |
| Pollen                                                  | Emissions of pollen <sup>(b)</sup> from birch, olive, ragweed and grass                                                                                                                 |
| SeaSalt                                                 | Emissions of SeaSalt_f and SeaSalt_c                                                                                                                                                    |
| ShipNOx                                                 | Adds 'shipNOx' compound and its reactions for dealing with NOx plumes from shipping <sup>(d)</sup>                                                                                      |
| <br>                                                    |                                                                                                                                                                                         |
| <i>Biogenic VOC (BVOC) options</i>                      |                                                                                                                                                                                         |
| BVOC_IsoMT1_emis                                        | Emissions of C <sub>5</sub> H <sub>8</sub> and $\alpha$ -pinene <sup>(e)</sup>                                                                                                          |
| BVOC_IsoMT2_emis                                        | Emis. C <sub>5</sub> H <sub>8</sub> , $\alpha$ -pinene, and $\beta$ -pinene                                                                                                             |
| BVOC_IsoMT3_emis                                        | Emis. C <sub>5</sub> H <sub>8</sub> , $\alpha$ - and $\beta$ -pinene, and other monoterpenes (XTERP)                                                                                    |
| BVOC_XTERP_CRI                                          | Reactions of "other monoterpenes" (XTERP) for use with CRIr2V5Em (optional)                                                                                                             |
| BVOC_SQT_NV                                             | Adds simple sesquiterpene emissions — treated as immediately transformed into non-volatile (particulate) secondary organic aerosol (SQT_-SOA_NV)                                        |
| BVOC_ExtraMTs                                           | Reactions of $\beta$ -pinene and XTERP for use with EmChem19a if BVOC_IsoMT3_emis is used                                                                                               |
| <br>                                                    |                                                                                                                                                                                         |
| <i>Secondary Organic Aerosol, SOA-associated extras</i> |                                                                                                                                                                                         |
| PM_VBS_EmChem19                                         | EMEP standard volatility basis set (VBS) SOA reactions for EmChem19-like chemistry <sup>(f)</sup> (can also be used with CRIv2R5Em); includes ASOA/BSOA from $\alpha$ -pinene surrogate |
| PM_VBS_ExtraMTs                                         | VBS BSOA reactions for (extended) EmChem19 and CRIv2R5Em-like schemes, for $\beta$ -pinene and XTERP; simple extension of <sup>(f)</sup> with additional monoterpenes                   |

---

*( continued on next page )*

---

Table S2 cont.

|                     |                                                                                                                                                                  |
|---------------------|------------------------------------------------------------------------------------------------------------------------------------------------------------------|
| PM_VBS_CB6r2Em      | ASOA/BSOA reactions for CB6r2Em; adaption of PM_VBS_EmChem19 to CB6r2Em                                                                                          |
| PM_Hodzic_EmChem19  | SOA formation reactions for EmChem19-like chemistry <sup>(g)</sup>                                                                                               |
| PM_Hodzic_Aromatics | ASOA formation from aromatics, for CRIV2R5Em scheme <sup>(g)</sup>                                                                                               |
| PM_Hodzic_BPINENE   | BSOA formation from $\beta$ -pinene, for extended EmChem19a (using BVOC_ExtraMTs) or CRI schemes <sup>(g)</sup>                                                  |
| PM_Hodzic_XTERP     | BSOA formation from XTERP monoterpene surrogate, for extended EmChem19a (using BVOC_ExtraMTs) or extended CRI schemes (using BVOC_XTERP_CRI) <sup>(g)</sup>      |
| PM_Hodzic_CB6       | ASOA and BSOA formation reactions for CB6r2Em <sup>(g)</sup>                                                                                                     |
| PM_JPAC_MT3         | Semi-empirical BSOA formation reaction for C5H8, $\alpha$ - and $\beta$ -pinene, and XTERP, as used in McFiggans et al. 2019 (combined with PM_Hodzic_Aromatics) |

Notes: <sup>(a)</sup> c.f. Stadtler et al. (2018); Simpson et al. (2018); <sup>(b)</sup> c.f. Sofiev et al. 2017; <sup>(c)</sup> Simpson et al. (2015); <sup>(d)</sup> Bergström et al. (2012); Simpson et al. (2012); <sup>(e)</sup> As in boxChem, Table S1. <sup>(f)</sup> Default is ‘NPAS’ VBS scheme used, see Sect. 5, Simpson et al. (2012); <sup>(g)</sup> Loosely based upon VBS system by Hodzic et al. (2016).

### S3. Time-steps for boxChem simulations

The config\_box.nml file allows for a user-defined ‘external’ time-step,  $dt$ , which is typically set at 30 seconds. This time-step governs the frequency at which emissions, photolysis, and rate-coefficients are updated. The chemical solver (ChemSolver) is called once per  $dt$  time-step, but then ChemSolver implements between 5–15 sub-timesteps. First, 5 very short time-steps (between 0.2 to 1 s, depending on  $dt$ ) are used to bring the chemistry into rapid equilibrium, and then 5–10 longer timesteps are used for the remainder of  $dt$ .

Using calculations with  $dt=1$  s as a reference (which gives an internal dif time-step  $dt_i$  of 0.2 s), we have calculated the relative root mean square error,  $RRMS_k$ , for several key species  $k$  for  $dt$  ranging from 3 s to 600 s.  $RRMS_k$  is defined as:

$$RRMS_k = \sqrt{\frac{\sum_{n=1}^N (c_k^n(1) - c_k^n(dt))^2}{\sum_{n=1}^N (c_k^n(1))^2}}$$

where  $c_k^n(dt)$  is the calculated concentration of species  $k$  at hour  $n$  with timestep  $dt$  (in seconds). In the examples presented here, we use a 24h ( $N=24$ ) simulation, starting at noon.

**Table S3.** Calculated  $RRMS_k$  values for a 24 hour simulation of EmChem19a, and external time-steps ( $dt$ ) of between 1–600 s

| Species              | $c(1)^{(a)}$<br>(ppb) | $RRMS_k$ (in %) values for $dt=$ |        |        |        |        |        |        |        |
|----------------------|-----------------------|----------------------------------|--------|--------|--------|--------|--------|--------|--------|
|                      |                       | 3                                | 10     | 30     | 60     | 120    | 240    | 450    | 600    |
| O3                   | 3.473e+01             | 0.0021                           | 0.0099 | 0.0326 | 0.0668 | 0.1362 | 0.2807 | 0.5570 | 0.7760 |
| OH                   | 2.077e-04             | 0.0043                           | 0.0200 | 0.0600 | 0.1081 | 0.1793 | 0.2858 | 0.4957 | 0.6904 |
| HO2                  | 8.751e-03             | 0.0047                           | 0.0235 | 0.0766 | 0.1504 | 0.2851 | 0.5360 | 0.9966 | 1.3778 |
| NO                   | 2.544e-01             | 0.0115                           | 0.0556 | 0.1788 | 0.3463 | 0.6285 | 1.0537 | 1.7075 | 2.2788 |
| NO2                  | 1.911e+00             | 0.0027                           | 0.0135 | 0.0452 | 0.0905 | 0.1758 | 0.3418 | 0.6613 | 0.9219 |
| PAN                  | 2.427e-01             | 0.0037                           | 0.0175 | 0.0581 | 0.1194 | 0.2449 | 0.5112 | 1.0369 | 1.4660 |
| NO3                  | 5.235e-03             | 0.0041                           | 0.0180 | 0.0571 | 0.1151 | 0.2298 | 0.4574 | 0.8673 | 1.1756 |
| N2O5                 | 1.046e-02             | 0.0028                           | 0.0123 | 0.0396 | 0.0798 | 0.1572 | 0.2993 | 0.5334 | 0.7095 |
| CPU <sup>(b)</sup> : | 10.17                 | 3.38                             | 2.02   | 1.00   | 0.52   | 0.25   | 0.13   | 0.07   | 0.05   |

Notes: (a) mean concentrations calculated for  $dt=1$  s; (b) CPU time relative to  $dt=30$  s run.

Tables S3–S4 illustrate the changes in  $RRMS_k$  (in percent) with  $dt$  for some key species with EmChem19a and MCMv3.3Em systems. For our typical  $dt$  of 30 s,  $RRMS_k$  are seen to be largest for NO and N2O5, but are  $\leq 0.2\%$  for those species in both schemes. Even with  $dt$  of 120 s  $RRMS_k$  values don't exceed 1%. RFor  $dt=600$  s the  $RRMS_k$  are about 1–2% for EmChem19a, but much larger for the MCM scheme. Users may of course experiment with these choices, but the default  $dt=30$  s seems adequate for normal boxChem usage.

Table S3 also illustrates the CPU required (relative to the  $dt=30$  s case) for these runs (as calculated on a desktop PC, x86\_64 linux processor, gfortran 5.4). The 30 s case is seen to require about 20 times more CPU than  $dt=600$  s, but this corresponds to only 4 s real time. The  $dt=1$  s case requires nearly 10 times more CPU than the 30 s, but for EmChem19a this is only 40 s real time. For MCMv3.3Em the CPU used is far greater, ca. 40 h for  $dt=1$  s, ca. 4 h for  $dt=30$  s, and ca. 1 hour for  $dt=120$  s. (In future the MCM scheme might be made much more CPU efficient by omission of non-used VOC and halogen precursors.)

**Table S4.** Calculated  $RRMS_k$  values for a 24 hour simulation with MCMv3.3Em, and external time-steps (dt) of between 1–600 s

| Species | c(1)      | $RRMS_k$ (in %) values for dt= |        |        |        |        |        |        |        |
|---------|-----------|--------------------------------|--------|--------|--------|--------|--------|--------|--------|
|         | (ppb)     | 3                              | 10     | 30     | 60     | 120    | 240    | 450    | 600    |
| Species | 1         | 3                              | 10     | 30     | 60     | 120    | 240    | 450    | 600    |
| O3      | 3.488e+01 | 0.0021                         | 0.0097 | 0.0324 | 0.0675 | 0.1436 | 1.7375 | 0.5737 | 0.7631 |
| OH      | 1.938e-04 | 0.0041                         | 0.0191 | 0.0570 | 0.1026 | 0.1730 | 2.8830 | 3.2349 | 3.6909 |
| HO2     | 7.948e-03 | 0.0051                         | 0.0246 | 0.0802 | 0.1608 | 0.3289 | 7.4843 | 7.0996 | 8.2689 |
| NO      | 2.546e-01 | 0.0115                         | 0.0552 | 0.1774 | 0.3445 | 0.6351 | 4.5669 | 1.6685 | 3.3062 |
| NO2     | 1.902e+00 | 0.0026                         | 0.0133 | 0.0445 | 0.0900 | 0.1818 | 1.5367 | 0.5717 | 0.7002 |
| PAN     | 2.337e-01 | 0.0039                         | 0.0185 | 0.0624 | 0.1348 | 0.3027 | 8.8077 | 4.7753 | 4.4970 |
| NO3     | 4.568e-03 | 0.0038                         | 0.0171 | 0.0542 | 0.1113 | 0.2277 | 0.5133 | 0.6467 | 0.6832 |
| N2O5    | 9.001e-03 | 0.0027                         | 0.0119 | 0.0385 | 0.0780 | 0.1544 | 0.3114 | 0.4404 | 0.5226 |
| CPU:    | 10.03     | 3.34                           | 2.00   | 1.00   | 0.50   | 0.25   | 0.12   | 0.07   | 0.05   |

Notes: as Table S3
